# Supplementary material
Source: Springer Nature journal article supplement (http://www.springermedizin.de/resource/supplementary/12968_2007_7_MOESM1_ESM.pdf/9577910)

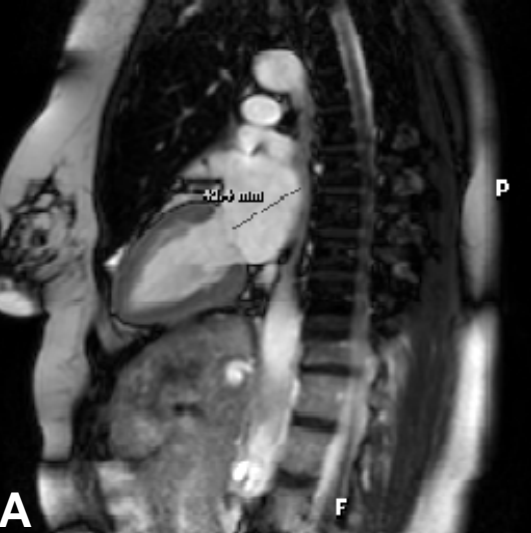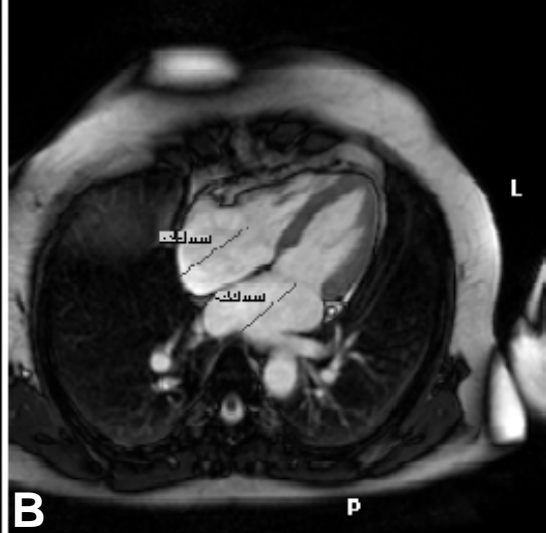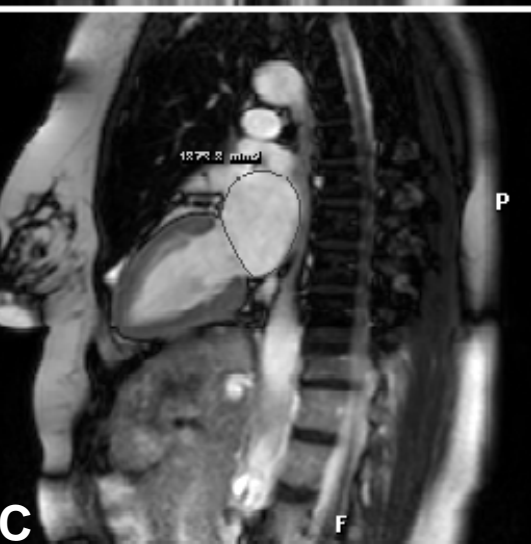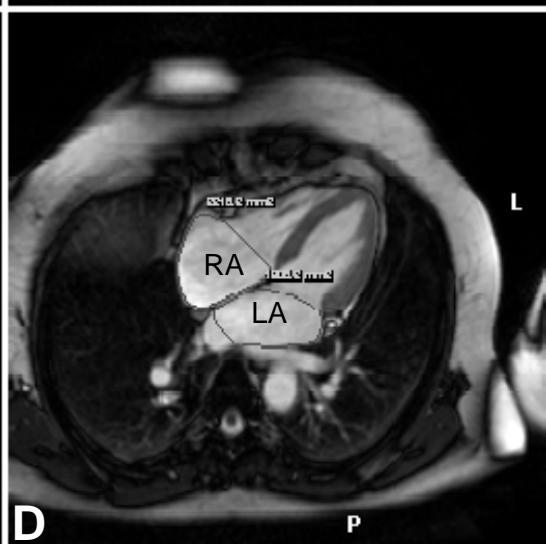

Supplement: MOESM1 [file 9577910]
